# Supplementary material for: Spear and Shield: Evolution of Integrated Circuit Camouflaging
Source: Springer Nature journal article supplement (doi:10.1007/s11390-018-1807-6), 2018-01-01
Supplement: 11390_2018_1807_MOESM1_ESM.pdf [file 11390_2018_1807_MOESM1_ESM.pdf]

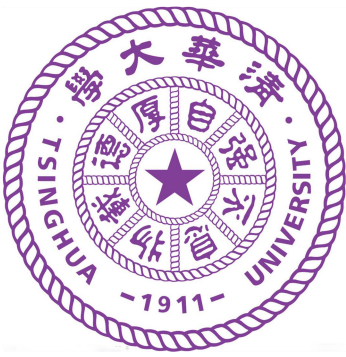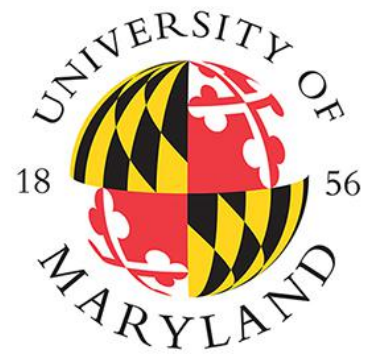

# Spear and Shield: Evolution of Integrated Circuit Camouflaging

---

*Xueyan Wang*, Qiang Zhou, Yici Cai, Gang Qu

Wang XY, Zhou Q, Cai YC et al. Spear and shield: Evolution of integrated circuit camouflaging. JOURNAL OF COMPUTER SCIENCE AND TECHNOLOGY 33(1): 42–57 Jan. 2018. DOI 10.1007/s11390-018-1807-6

# Why Gate Camouflaging?

- Design Complexity & Design Cost Increase.
- Intellectual Property (IP) Infringement Enabled by Reverse Engineering (RE).
- Gate Camouflaging---Proactive Countermeasure against RE
  - Camouflaged cells can be configured to have one of the multiple functionalities with identical look.
  - Selective gates are replaced by camouflaged cells.

Various camouflaged cells

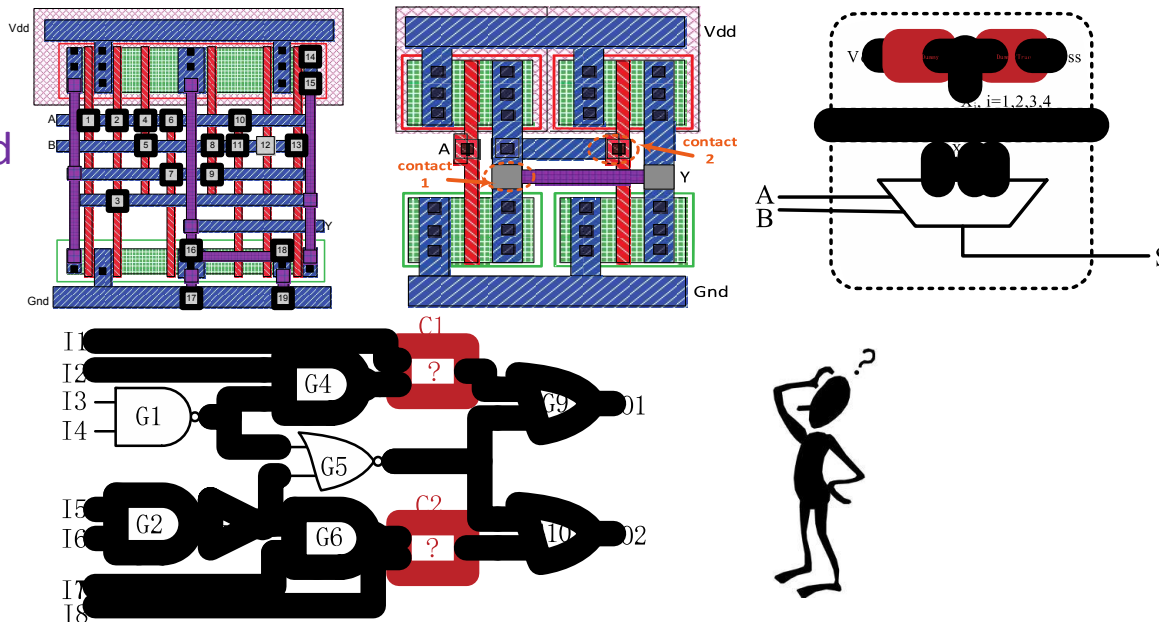

# Existing De-Camouflaging Attacks

---

- **Brute Force Attack (BFA)**
  - Enumerate to try each possible functionality combination and compare with the functional IC.
- **IC Testing-Based Attack (ITA)**
  - Get the input-output behaviors of each camouflaged gate by justifications and sensitizations.
- **SAT-Based Attack (SATA)**
  - Prune incorrect functionality combinations with a discriminating set of input patterns by SAT solvers.
- **Circuit Partition Attack (CPA)**
  - Apply the divide and conquer methodology to partition camouflaged gates into multiple sub-circuits and de-camouflage each sub-circuit separately.

# Defenses Against De-Cam. Attacks

---

## ■ Clique-Based camouflaging

- Ensure that each camouflaged gate's either inputs cannot be justified, or output cannot be sensitized.

## ■ CamoPerturb

- Perturb one minterm of the original design, and “re-correct” it with additional camouflaged module.

## ■ And-Tree Camouflaging

- Camouflage the inputs of And-tree structure, to prevent controlling the inputs of camouflaged gates.

## ■ Equivalent Class-Based Camouflaging

- Select gates for camouflaging from one certain equivalent class to avoid being partitioned into different sub-circuits to attack separately.

# Challenges and Opportunities

---

- How to reduce the overhead incurred by circuit camouflaging would continue to be an urgent need.
- Design countermeasures against the newly proposed SAT-based de-camouflaging attacks.
- Explore intrinsic reconfigurable properties of emerging devices and how they can be utilized for circuit camouflaging.
